# Supplementary material for: Enabling animal rabies diagnostic in low-access areas: Sensitivity and specificity of a molecular diagnostic test from cerebral tissue dried on filter paper
Source: PLOS journal article supplement (doi:10.1371/journal.pntd.0008116), 2020-03-06
Supplement: S3 (10.1371/journal.pntd.0008116.s003) [file journal.pntd.0008116.s003]

## Index test: RT-hn-PCR-T

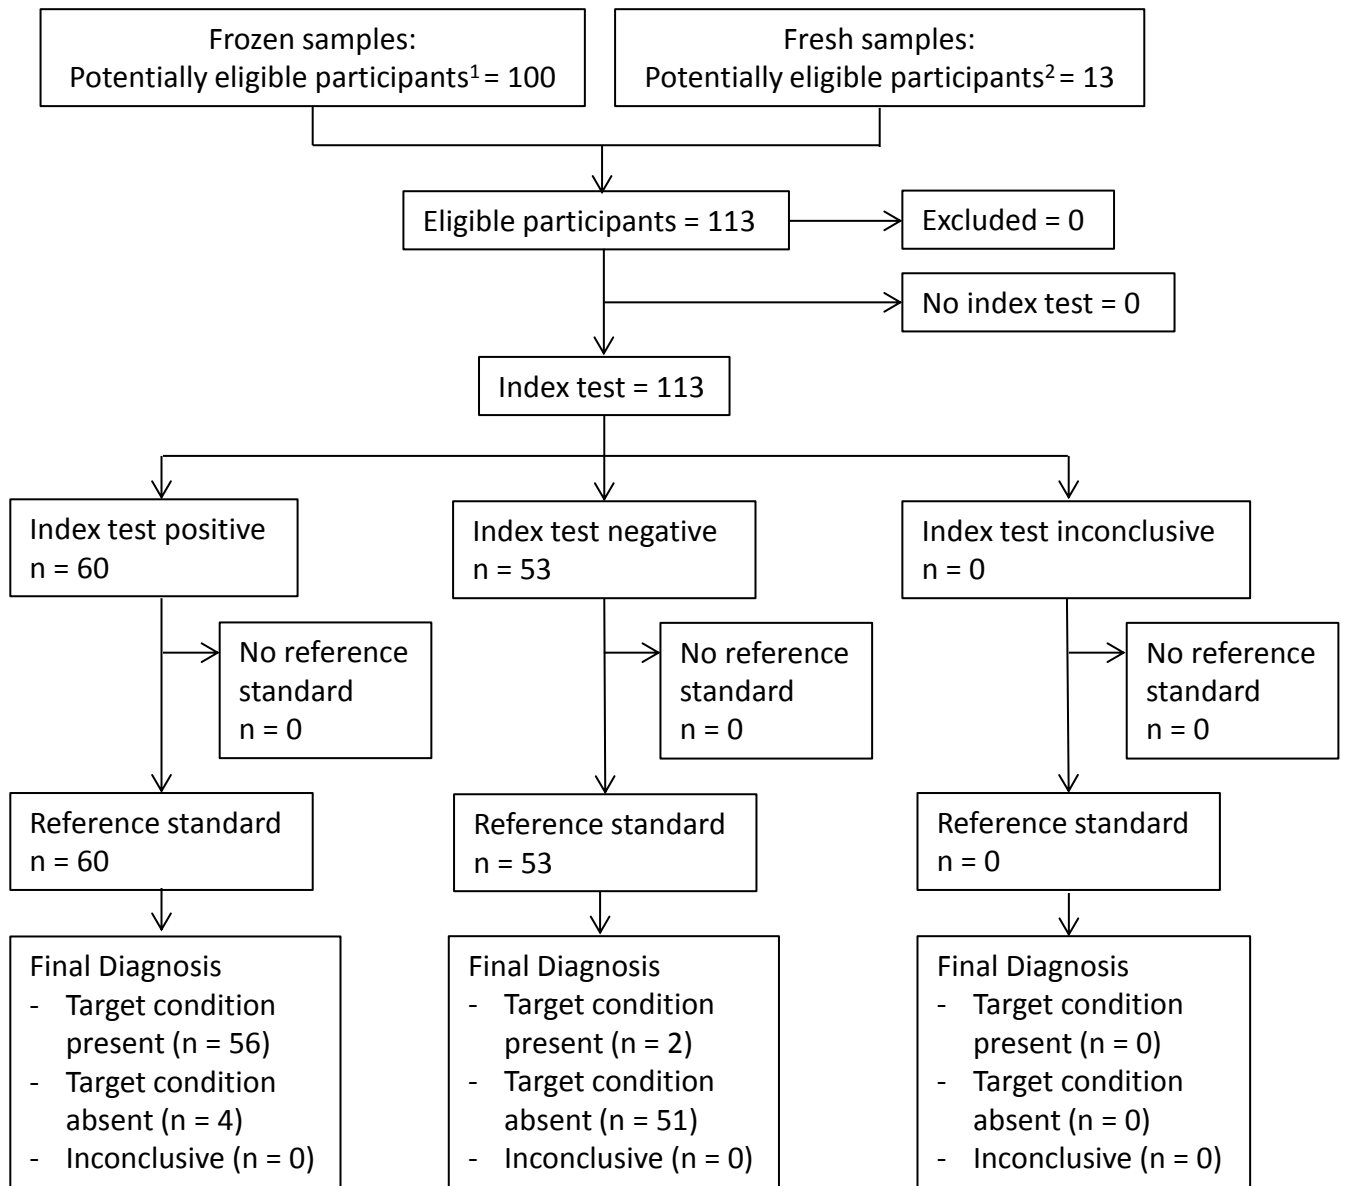

<sup>1</sup> population: 100 most recent samples with sufficient volume, respecting approximatively a balance between FAT-positive and FAT-negative samples

<sup>2</sup> population: fresh samples arrived at the LNR during the study period

**S1 Fig: STARD (Standards for Reporting Diagnostic Accuracy) flow diagram for RT-hn-PCR-T**
